# Supplementary material
Source: PubMed Central journal article supplement (PMC7404330)
Supplement: JGS-68-2167-s001.pdf [file JGS-68-2167-s001.pdf]

**Supplemental Table 1.** Association of skilled nursing facility characteristics and county SARS-CoV-2 prevalence with the probability of a facility having at least one resident with SARS-CoV-19 (n=3,357)

| Characteristic                                  | Marginal Effect | Standard Error | 95% CI |        | <i>P</i> |
|-------------------------------------------------|-----------------|----------------|--------|--------|----------|
| No. Beds (10s)                                  | 0.90            | 0.159          | 0.576  | 1.230  | <0.001   |
| Admissions per bed per year                     | 0.09            | 0.663          | -1.276 | 1.455  | 0.89     |
| Mean resident age                               | 0.22            | 0.116          | -0.022 | 0.456  | 0.07     |
| % Black                                         | 0.19            | 0.095          | -0.003 | 0.386  | 0.05     |
| % dementia                                      | -0.03           | 0.051          | -0.130 | 0.079  | 0.62     |
| 1-2 Star-rating for health inspections (Ref. 3) | 0.67            | 1.388          | -2.191 | 3.525  | 0.64     |
| 4-5 Star-rating for health inspections (Ref. 3) | -2.88           | 1.058          | -5.062 | -0.702 | 0.01     |
| 1-2 Star-rating for staffing (Ref. 3)           | 0.57            | 1.570          | -2.664 | 3.802  | 0.72     |
| 4-5 Star-rating staffing (Ref. 3)               | -1.91           | 1.597          | -5.195 | 1.383  | 0.24     |
| Infection control citation                      | 1.10            | 1.790          | -2.586 | 4.788  | 0.54     |
| County Prevalence (%)                           | 33.64           | 11.683         | 9.574  | 57.698 | 0.008    |

Note: Analysis was conducted on 341 Genesis and 3,016 non-Genesis skilled nursing facilities. The outcome was whether or not a facility had at least one resident with SARS-CoV-2 as of April, 21, 2020 (date when collection of state data for non-Genesis facilities was completed). Point estimates are obtained from a linear regression model with state effects. Standard errors were clustered by state. County prevalence (as of April 21, 2020) is represented as a percentage in the model, such that a 1 percent change is equivalent to a change in 1000 cases per 100,000 population. Ref=reference group

**Supplemental Table 2.** Association between skilled nursing facility characteristics and count of SARS-CoV-2 resident cases among Genesis facilities with an outbreak (n=154).

| Characteristic                     | Marginal Effect | Standard Error | 95% CI |       | <i>P</i> |
|------------------------------------|-----------------|----------------|--------|-------|----------|
| No. Beds (10s)                     | 1.96            | 0.53           | 0.92   | 2.99  | <0.001   |
| Admissions per bed per year        | -3.53           | 1.96           | -7.37  | 0.31  | 0.07     |
| Mean resident age                  | 0.79            | 0.70           | -0.58  | 2.17  | 0.26     |
| % Black                            | -0.13           | 0.18           | -0.49  | 0.23  | 0.29     |
| % dementia                         | 0.13            | 0.12           | -0.11  | 0.36  | 0.48     |
| Star-rating for health inspections | 1.52            | 2.21           | -2.81  | 5.85  | 0.49     |
| Star-rating for staffing           | -1.75           | 3.28           | -8.18  | 4.68  | 0.59     |
| Infection control citation         | -5.84           | 5.05           | -15.75 | 4.06  | 0.25     |
| Facility underwent full testing    | 6.44            | 5.69           | -4.72  | 17.60 | 0.26     |
| County prevalence (%)              | 12.60           | 4.17           | 4.42   | 20.78 | 0.003    |
| Date of first county case          | -0.84           | 0.36           | -1.55  | -0.14 | 0.02     |

Note: Analysis was conducted on 154 Genesis skilled nursing facilities reporting at least one confirmed resident case as of May 4, 2020. Point estimates are obtained from a Poisson regression model with standard errors clustered by state. Marginal effects were calculated using predictive margins. County prevalence (as of May 4, 2020) is represented as a percentage in the model, such that a 1 percent change is equivalent to a change in 1000 cases per 100,000 population.
